# Supplementary material
Source: PubMed Central journal article supplement (PMC10010501)
Supplement: NIHMS1875509-supplement-supplemental.pdf [file NIHMS1875509-supplement-supplemental.pdf]

**Brissette et al. (2009), *Microbiology* 155, 863–872**

**Fig. S1.** Alignment of predicted amino acid sequences of *B. burgdorferi* strain B31 ErpX and the two known borrelial Erp proteins most similar to ErpX: the ErpX protein of strain N40 and the ErpQ protein of strain B31. Immature (non-processed, non-lipidated) forms are shown to illustrate overall similarities between the two proteins. Identical amino acids are boxed and shaded. The 84 amino acid central region of ErpX that by itself is sufficient for laminin binding, as identified by recombinant protein rErpX15, is indicated by a line over the ErpX sequence.

Fig. S1 for Brissette et al. (2009), Microbiology 155, 863–872

ErpX (B31) MNK **K**M**K**I**L**E**I**I**C**A**V**F**V**L**I**S**S**C**K**L**D**A**T**G**K**D ATGKDATGKDATGKDATGKNA**E**Q**N**I**K**G**K**V**Q**G**F**L**E**K**I**  
 Erp26 (N40) MNK **T**I**K**L**L**I**C****S**V**F**V**L**I**S**S**C**K**N****Y**A**I**-**K**D - - - - - L**E**Q**K**T**K**G**Q**V**N**G**F**I**D**R**A**  
 ErpQ (B31) MNK**K**I**T** - - **L**L**I****C**A**V**F**A**L**I****T****S**C**K**N**F**A**T**G**K**D - - - - - I**K**Q**N****S**E**G**K**I****K**G**F**V**N**K**I**

ErpX (B31) LDPV**K**D**K**I**A**S**N**G**P**I**A**D**E**L**A**K**K**L**Q**E**E**E**K**- - **V**N**N**G**E**E**E**N**D**K**A**V**F**L**G**E**E**S**K**E**D**E**E**E**N** - - **E**Q**A**V**N**-**L**E  
 Erp26 (N40) LDP**T**K**D**K**I****A**S**N**G**P****T**V**D****K**L**A**K**K**L**Q**E**E**E**K**E**E**L**M**Q**G**D**D****P****S**G**I**G**I**N**P**P**L**V**L**P**E**N**D****H**D**N**T**P**A**P****K**V**K**A**A**K  
 ErpQ (B31) LDPV**K**D**K**I**A**S**S**G**T**K**V**D**E**V**A**K**K**L**Q**E**E**E**K**E**E**L**M**Q**G**D**D****P****N**G**S**G**I**N**P**P**P**V**L**P**E**N**I****H**N**N**- - **A**L**V**L**K**A**I**E

ErpX (B31) **E**K**N**A**E**E**D****K**K**V**V**N**L**E****E****K**E**L**E**V****K**K**E****T**E**E**D**E**D- - - - -**K**E**E****I**E**K**Q-**K**Q**E**V**E**K**A**Q**E**- - - - -**R**K**Q**R**Q**E**E**K  
 Erp26 (N40) Q**S**G**G**Q**Q**E**K**K**V**E**D**Q**N**G**E**- - - - -**K**K**R**Q**E**Q**E**E**E**- - - - -**K**V**K**A**K****A**E**K**E**K**S**E**R- - - - -**Q**K**R**Q**Q**E**E**Q  
 ErpQ (B31) Q**S**D**G**Q**Q**E**K**K**V**E**E**A**E**A**K**V**E****E**N**K**E**K**Q**E**N**T**E**E**N**I**K**E****K**E**I****I**D**E**Q**N**K**Q**E**L**A**K**A**K**E**E**E**Q**Q**K**E**Q**K**R**H**Q**E**E**Q

ErpX (B31) **K**R**K**- - - - -**K**Q**E**Q**Q**E-**E**K**K**R**K**R**Q**E**Q**R**I**K**E**R**R**-**A**K**N**K**I**K**K**L**A**D**K**I**D**E**I**S**W**N**I**D**G**I- - - - -**E**S**Q**T**S**  
 Erp26 (N40) Q**R**K**A**K**K**E**H**Q**E**K**E**H**Q**E**K**E**R**E**R****E**R**E**R**E**E**E**E**K**Q**V****K**D**K**I**K**D**E**V**D**K**I**D**I**N**R****D**I**D**S**I**N**P**K**S**F**F**E**R**M**E**  
 ErpQ (B31) Q**R**K**A**K**A**E**K**E**K**R**E**R**E**E-**A**E**Q**Q**K**R**Q**E**E**E**E**K**R**Q**V****D**N**Q**L**K**T**L**I**A**K**I**D**E**I**N**E**N**I**D**V**I**- - - - -**K**W**Q**T**T**

ErpX (B31) **V**K**P**K**A**V**I**D**K**I**T**G**P**V**Y**D**Y**F**T**D**D**N**K**K- - **A**I**Y**K**T**W**G**D**L**E**D**E-**E**G**E**G**L**G**K**L**L**K**E**L**S**D**I**R**D**E**L**R**T**K**L**N**K**  
 Erp26 (N40) **V**S**G**Q**E**V**E**D**K**V**T**G**A**I**Y**D**K**I**T**S**D**N**S**R**D**N**S**L**Y**S**I**W**D**E**S**I**E**L**D**E**S**G**R**L**K**N**L**I**D**D**L**E**K**A**R**G**E**L**R****A**K**I**K**E**  
 ErpQ (B31) **V**G**P**Q**G**V**I**D**R**I**T**G**P**V**Y**D**D**F**T**N**G**I**N**- - - **S**I**R**E**T**W**E**G**L**E**E**E**S**E**D**E**G**L**G**K**L**L**K**E**L**S**D**A**R**D**A**L**R**T**K**L**N**E

ErpX (B31) **D**N**K**K**Y**Y**A**H**E**N**E**P**P**L**K**E**N**V**D**V**S**E**I**K**E**D**L**E**K**V**K**S**G**L**E**K**V**K**E**Y**L**K**D**N**S**K**F**E**E**I**K**G**Y**I**S**Y**S**Q  
 Erp26 (N40) **D**E- - - **Y**D**S**K**I**N**Q**K**N**K**N**I**V**K**V****G**D**I**K**S**D**L**E**K**L**K**S**K**L**D**K**V**K**E****Y**P**E**D**K**D**N**F**E**T**I**K**G**Y**I****E**D**S**N**S**  
 ErpQ (B31) **G**N**K**P**Y**T**G****Y**E-**E**P**K**L**K**E**S**V**N**V**S**E**I**K**E**D**L**E**K**L**K**S**K**L**E**V**K**K**Y**L**K**D**S****S**K**F**E**E**I**K**G**Y**I**S**D**S**Q
